# Supplementary material
Source: Springer Nature journal article supplement (https://www.springermedizin.de/resource/supplementary/12992_2010_119_MOESM4_ESM.pdf/9616500)
Supplement: MOESM4 [file 9616500]

Borehole

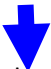

Raw water tank (usually PVC)

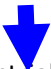

Industrial modules  
(consisting of sand bed filter and activated carbon)

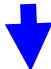

Treated water tank (usually PVC)

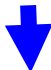

Micro-filters ( $5\mu$  -  $2\mu$  -  $0.5\mu$ )

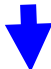

UV sterilizer  
(attached to sachet water machine)

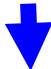

Sachets stocked in bigger bags and ready for distribution
